# Supplementary material for: Deciphering the Molecular Mechanism of Water Interaction with Gelatin Methacryloyl Hydrogels: Role of Ionic Strength, pH, Drug Loading and Hydrogel Network Characteristics
Source: MDPI journal article supplement (doi:10.3390/biomedicines9050574), 2021-05-19
Supplement: s1 [file s1]

Supplementary Materials

# Deciphering the Molecular mechanism for the Interaction of Water with Gelatin Methacryloyl Hydrogels: Role of Ionic Strength, pH, Drug Loading, and the Hydrogel Network Characteristics

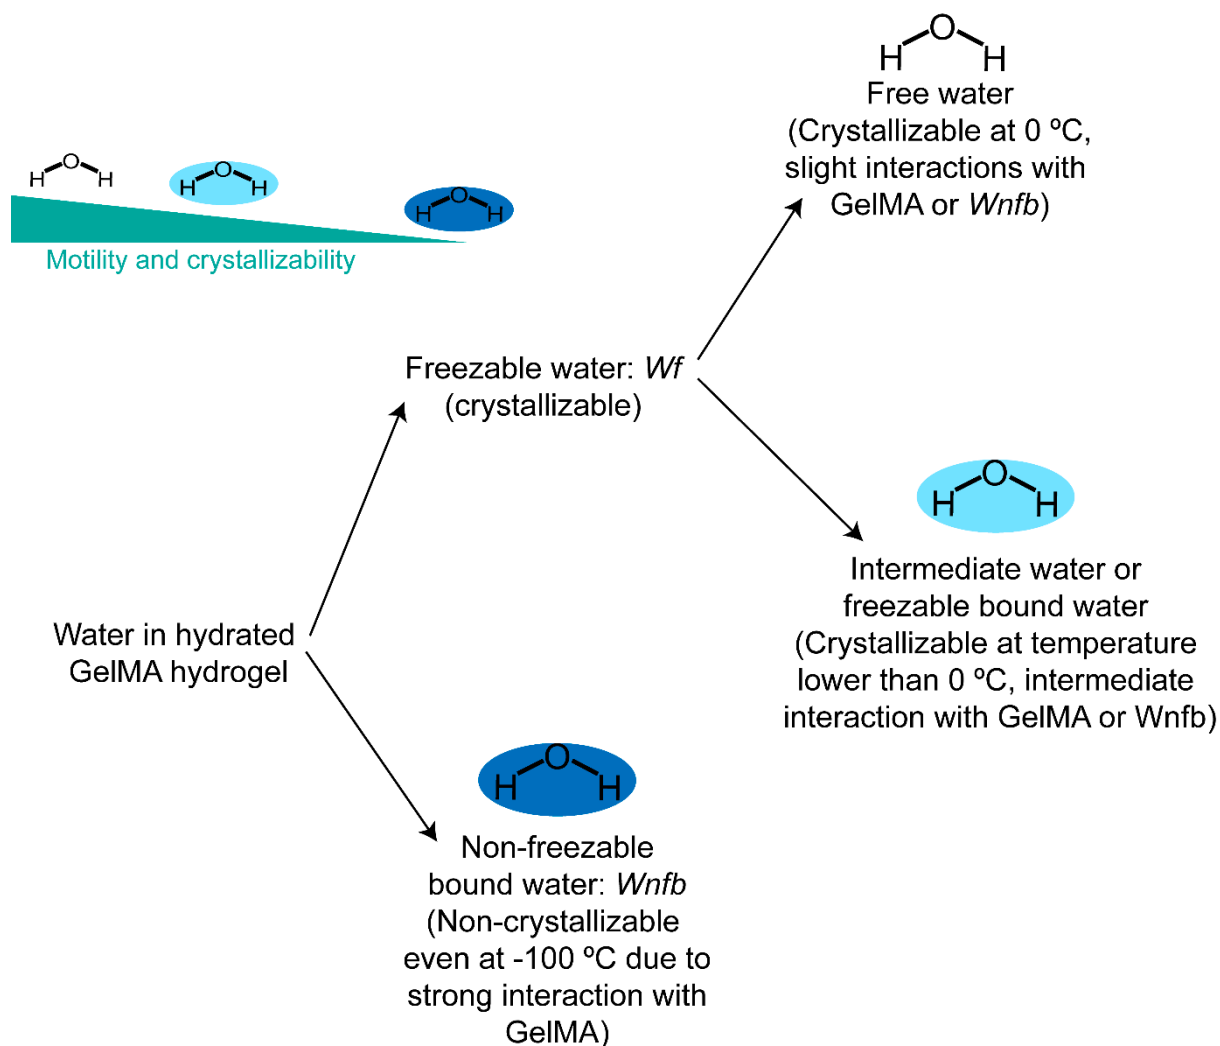

**Figure S1.** The different water states in hydrated GelMA hydrogels: Non-freezable bound water, freezable bound water (intermediate water), and free water. Modified from [1]. Differential scanning calorimetry (DSC) thermogram of 15% GelMA crosslinked in PBS and swelled in PBS.

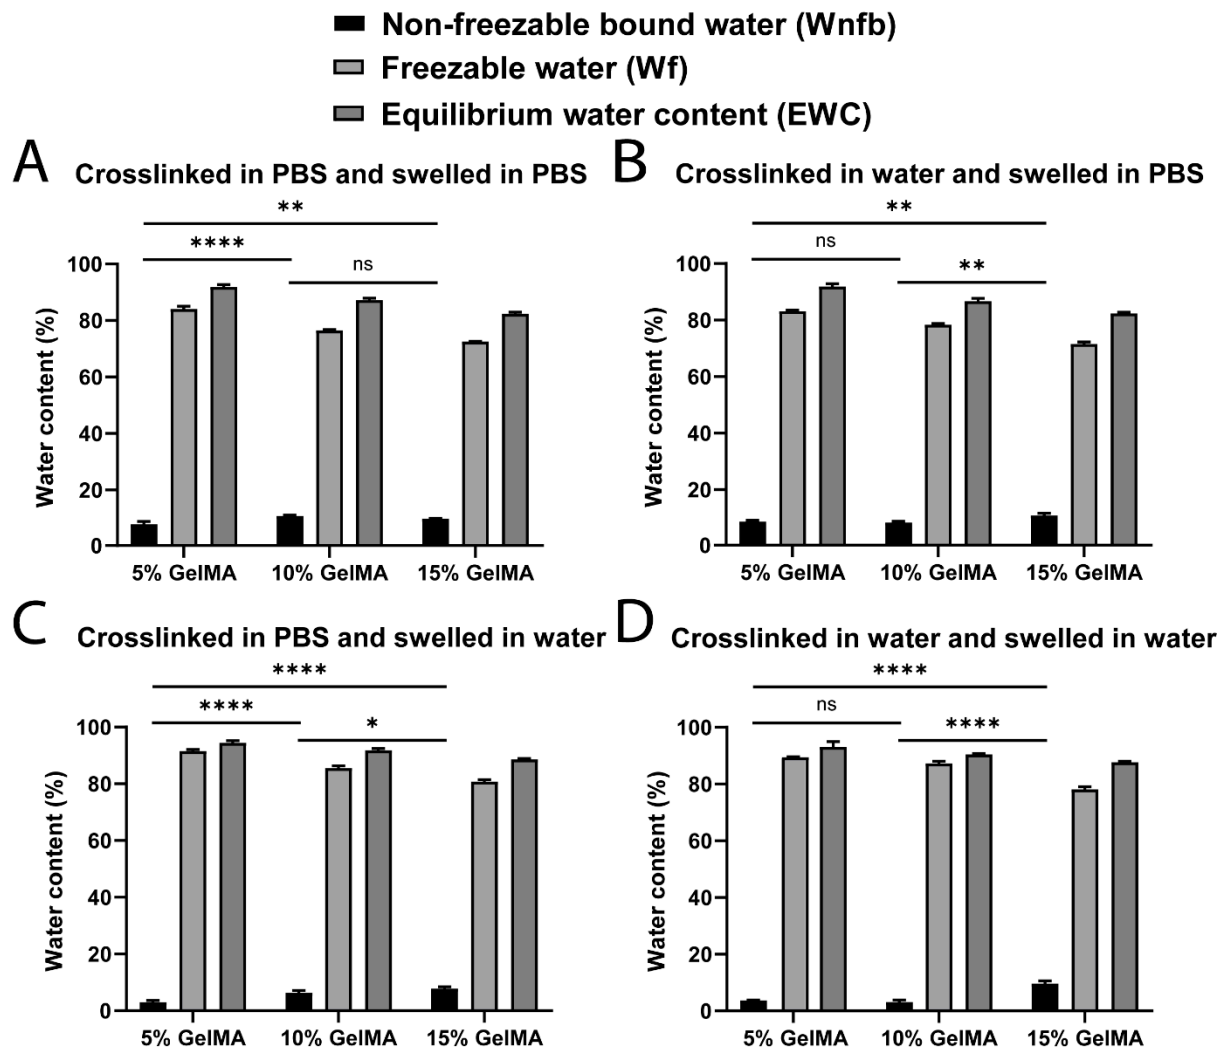

**Figure S2.** Water content for GelMA hydrogels (5% to 15%) crosslinked and swelled in different media. Non-freezable bound water ( $W_{nfb}$ ), freezable water ( $W_f$ ) and equilibrium water content (EWC) of GelMA hydrogel (A) crosslinked and swelled in PBS, (B) crosslinked in water and swelled in PBS, (C) crosslinked in PBS and swelled in water, and (D) crosslinked and swelled in water ( $n = 5$  for EWC;  $n = 3$  for  $W_{nfb}$  and  $W_f$ ). Ns = non significant. \* =  $p < 0.05$ . \*\* =  $p < 0.01$ . \*\*\*\* =  $p < 0.0001$ .

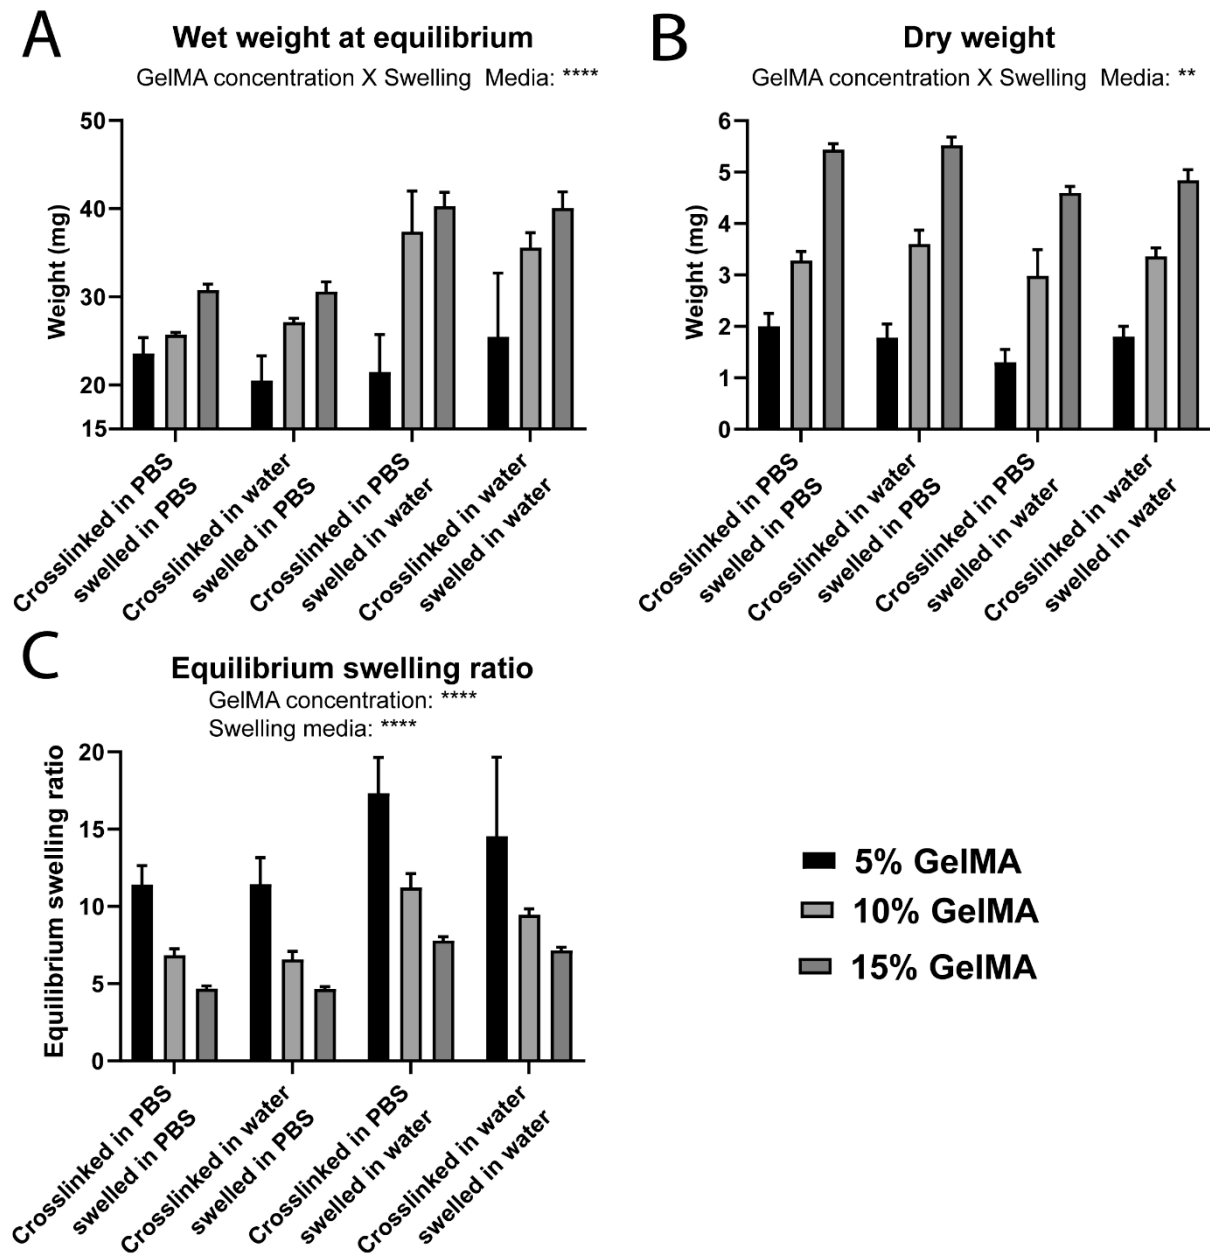

**Figure S3.** Wet weight, dry weight and equilibrium swelling ratio for GelMA hydrogels crosslinked and swelled in different media. (A) Wet weight, (B) Dry weight, (C) Equilibrium swelling ratio for GelMA hydrogels (5% to 15% gel fraction) crosslinked and swelled in different media.

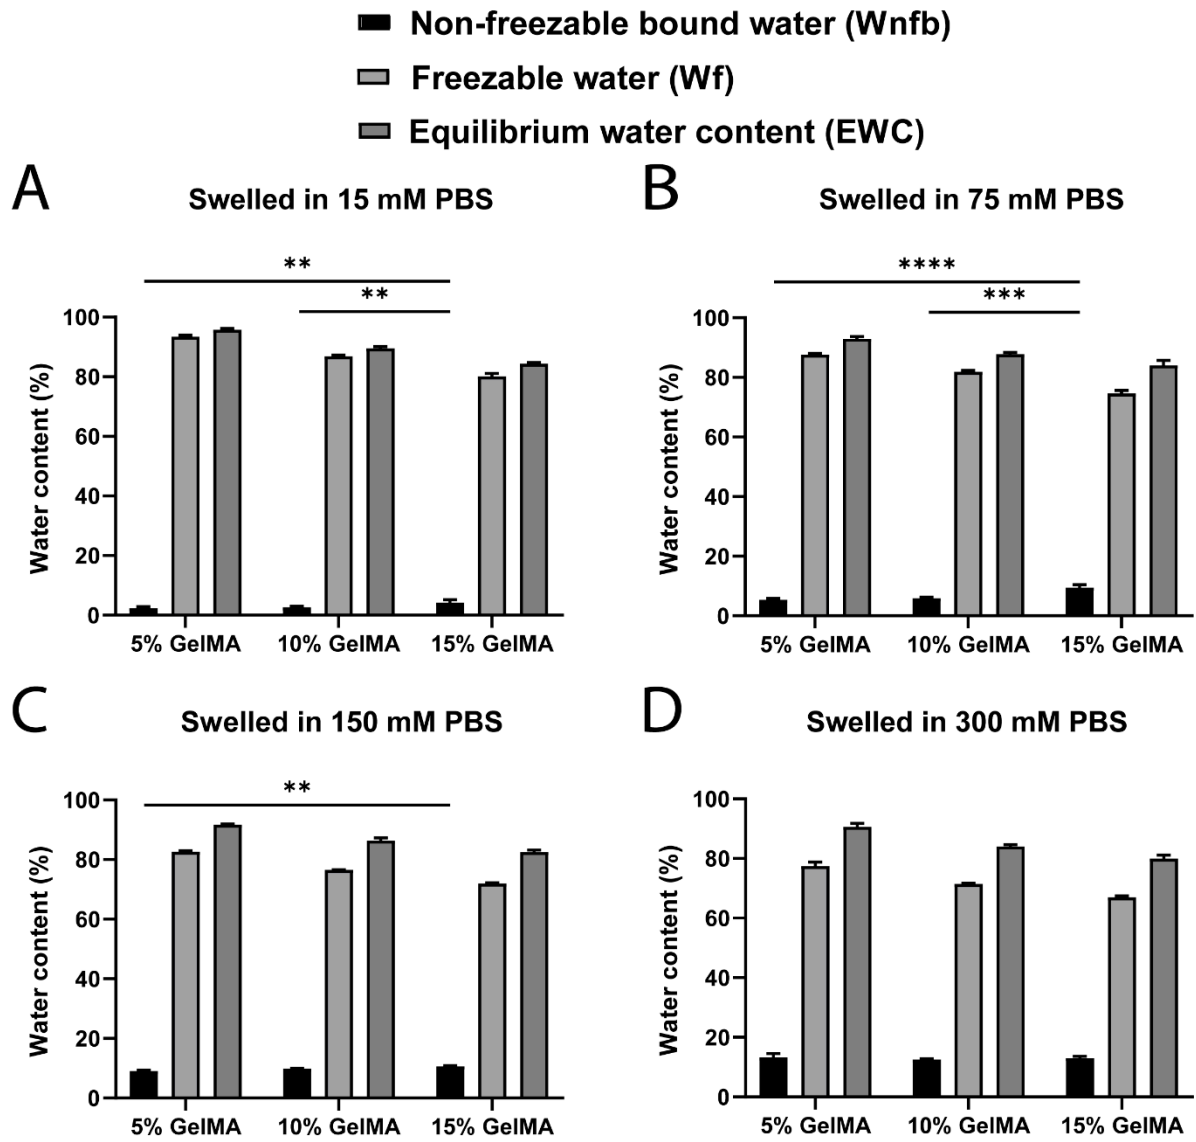

**Figure S4.** Water content for GelMA hydrogels (5% to 15% gel fraction) swelled in media with increasing ionic strength. (A) GelMA hydrogels were crosslinked in water and swelled in PBS at  $0.1\times = 15$  mM. (B) GelMA hydrogels were crosslinked in water and swelled in PBS at  $0.5\times = 75$  mM. (C) GelMA hydrogels were crosslinked in water and swelled in PBS at  $1\times = 150$  mM. (D) GelMA hydrogels were crosslinked in water and swelled in PBS  $2\times = 300$  mM. Equilibrium water content (EWC,  $n = 5$ ), non-freezable bound water ( $W_{nfb}$ ,  $n = 3$ ), and freezable water ( $W_f$ ,  $n = 3$ ). Ns = non-significant.  $** = p < 0.01$ .  $*** = p < 0.001$ .  $**** = p < 0.0001$ .

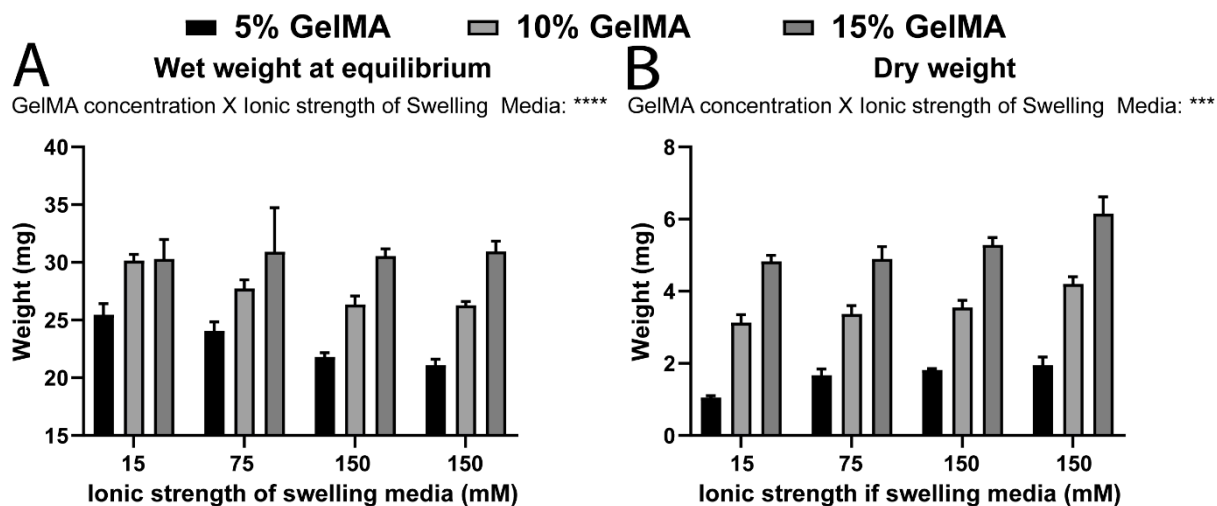

**Figure S5.** Wet weight and dry weight for GelMA hydrogels swelled in different ionic strengths. (A) Wet weight, (B) Dry weight, for GelMA hydrogels (5% to 15% gel fraction) swelled in different ionic strengths.

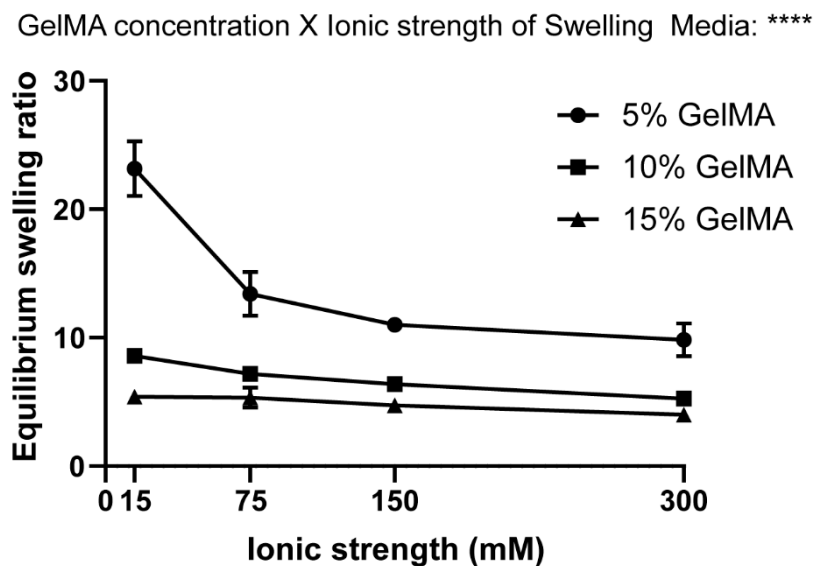

**Figure S6.** Equilibrium swelling ratio for GelMA hydrogels (5% to 15%) crosslinked in water and swelled at different ionic strengths.

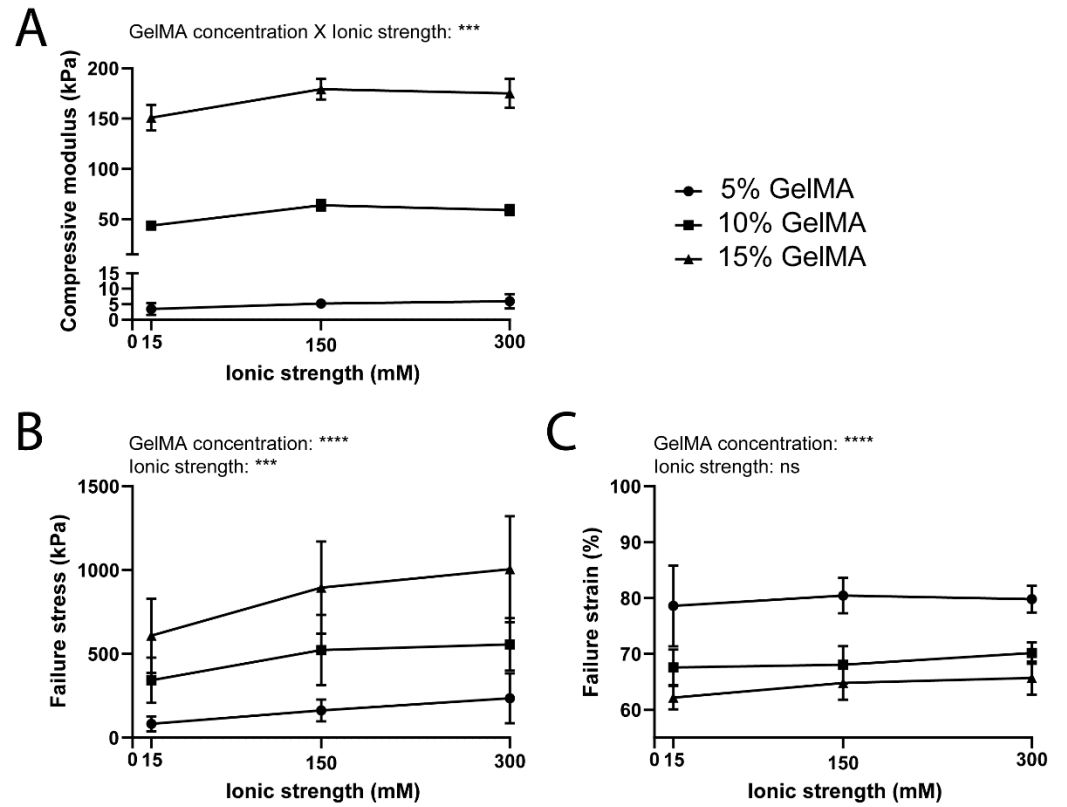

**Figure S7.** Mechanical properties for GelMA hydrogels (5% to 15% gel fraction) swelled at different ionic strength. (A) Compressive modulus. (B) Failure stress. (C) Failure strain. Data are shown as means  $\pm$  standard deviation,  $n = 6-8$ .

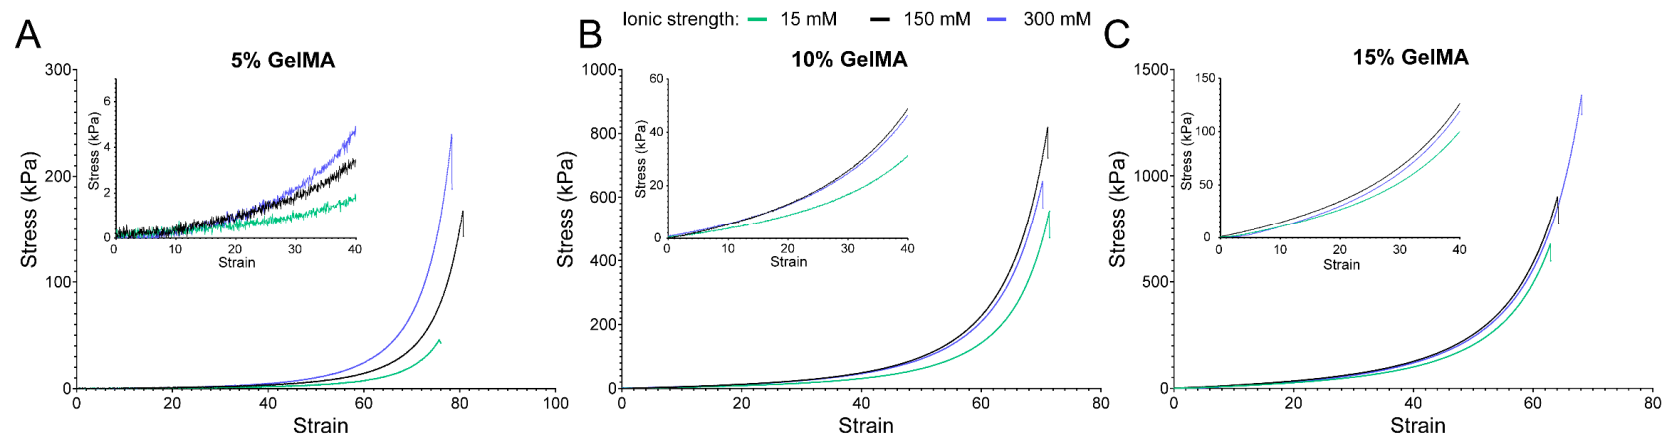

**Figure S8.** Representative stress-strain curves for (A) 5%, (B) 10%, and (C) 15% GelMA hydrogels crosslinked in water and swelled at different ionic strengths.

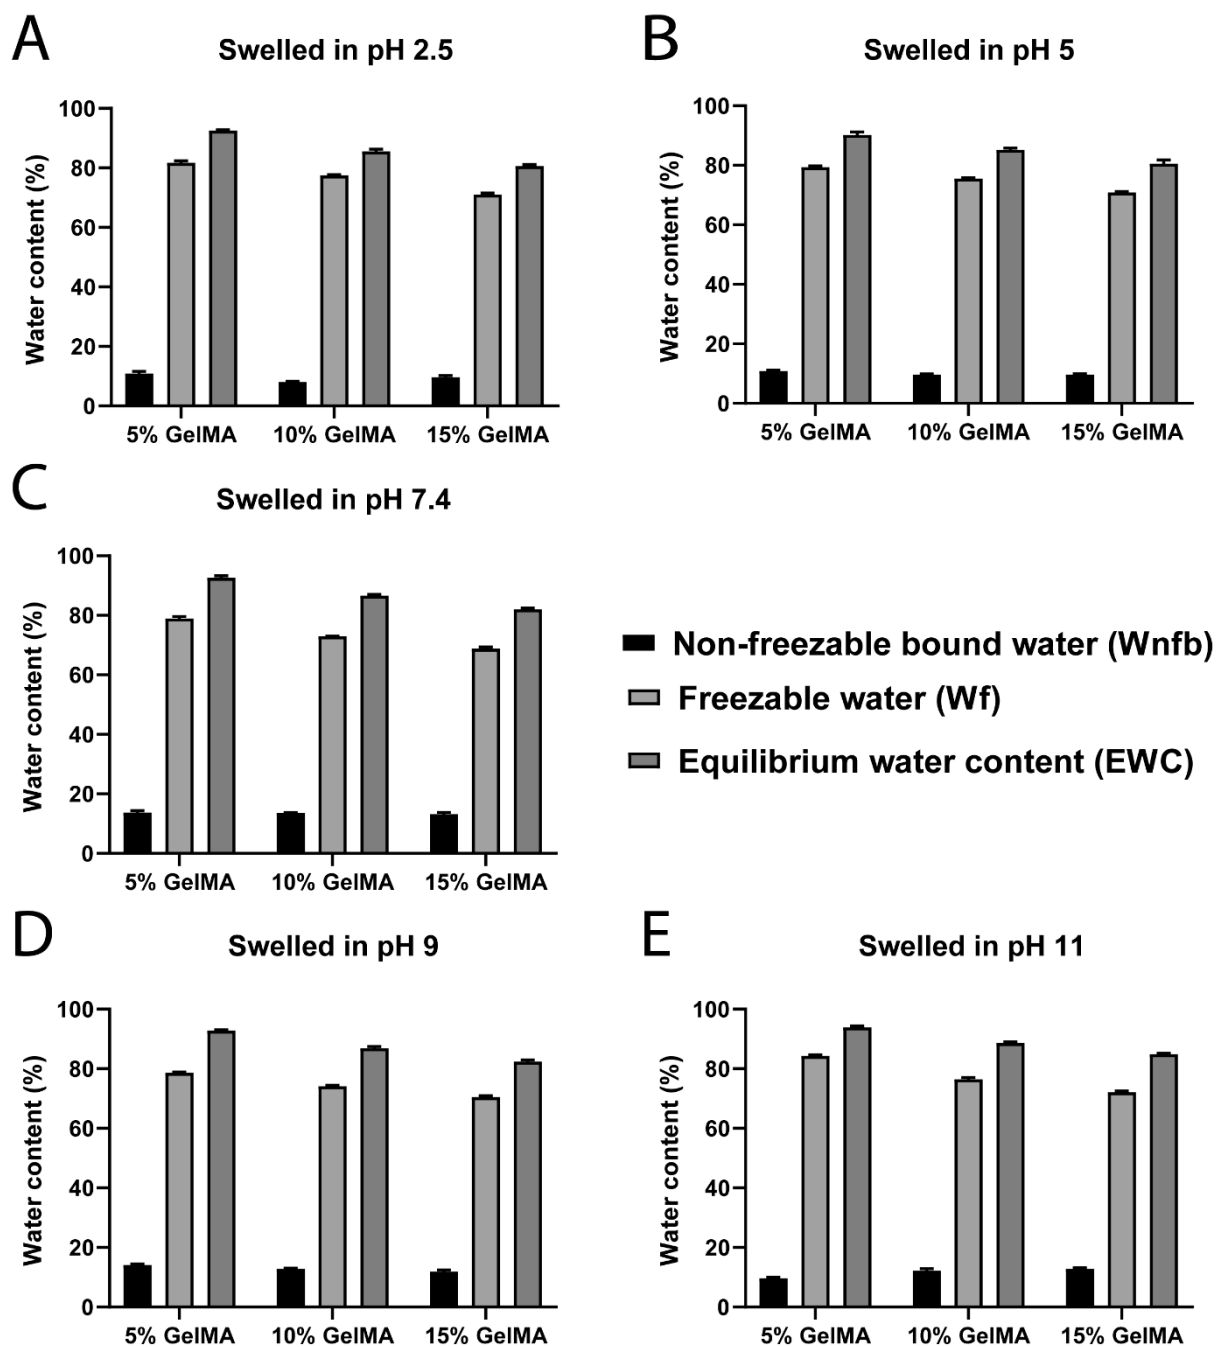

**Figure S9.** Water content for GelMA hydrogels (5% to 15% gel fraction) crosslinked in water and swelled in PBS at different pH. (A) pH 2.5. (B) pH 5. (C) pH 7.4. (D) pH 9. (E) pH 11. Equilibrium water content (EWC,  $n = 5$ ), non-freezable bound water (W<sub>nfb</sub>,  $n = 3$ ), and freezable water (W<sub>f</sub>,  $n = 3$ ).



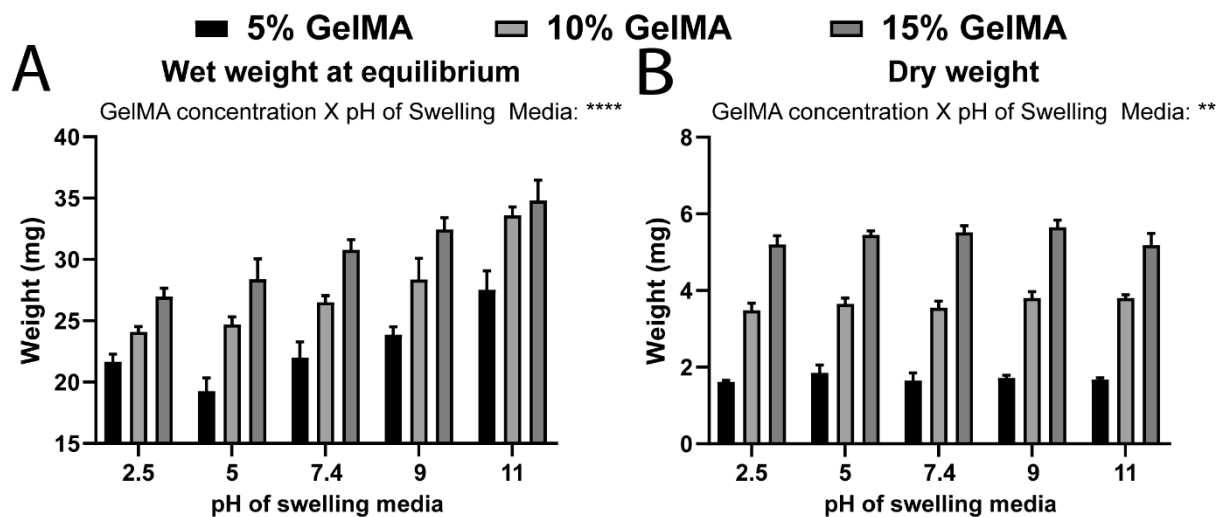

**Figure S10.** Wet weight and dry weight for GelMA hydrogels swelled in different pH. (A) Wet weight, (B) Dry weight, for GelMA hydrogels (5% to 15% gel fraction) swelled in different pH.

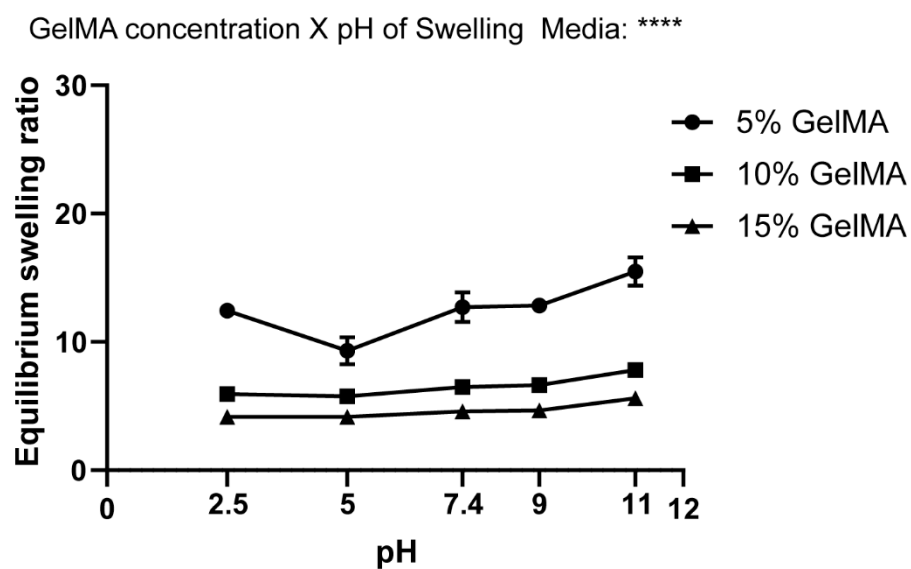

**Figure S11.** Equilibrium swelling ratio for GelMA hydrogels (5 to 15%) crosslinked in water and swelled at different pH.

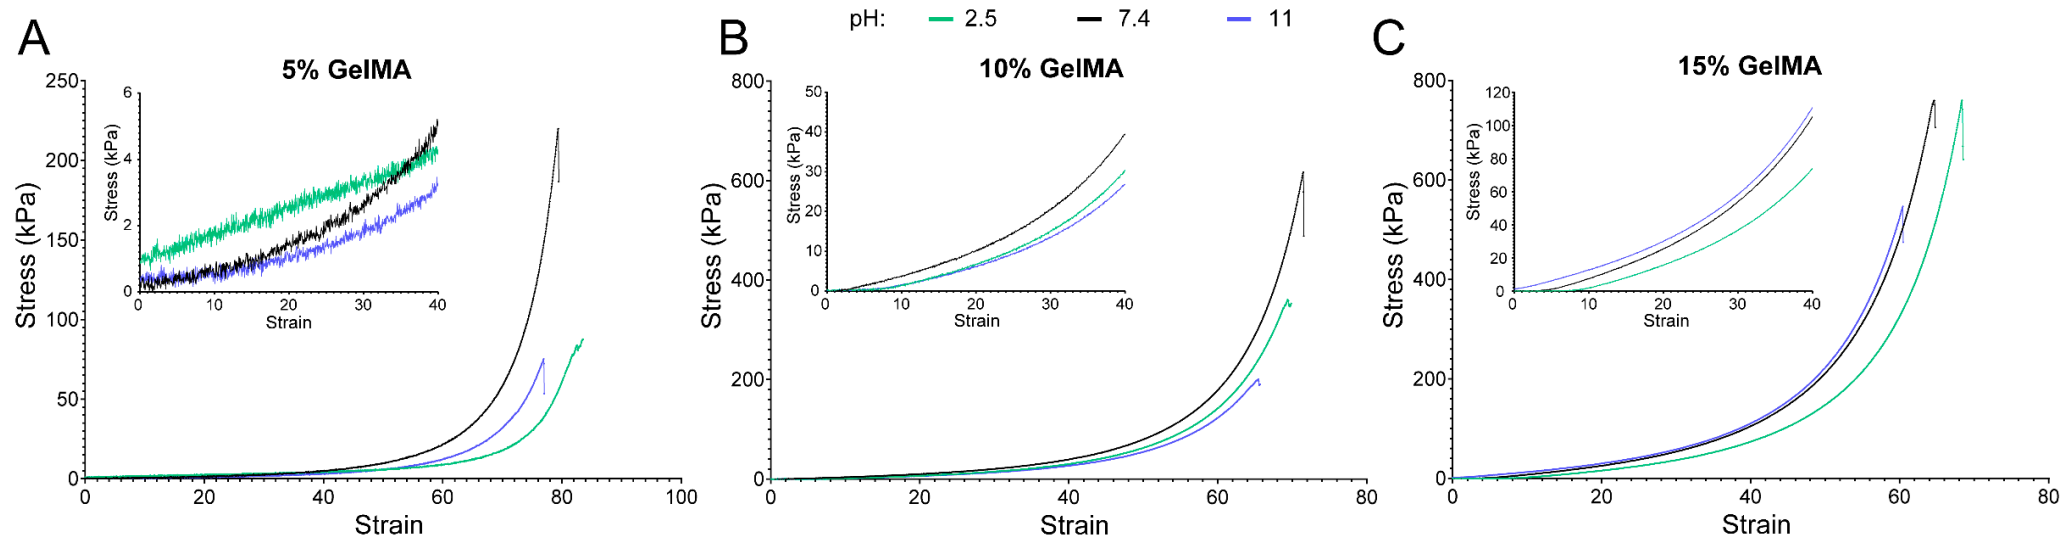

**Figure S12.** Representative stress-strain curves for (A) 5%, (B) 10%, and (C) 15% GelMA hydrogels crosslinked in water and swelled at different pH.

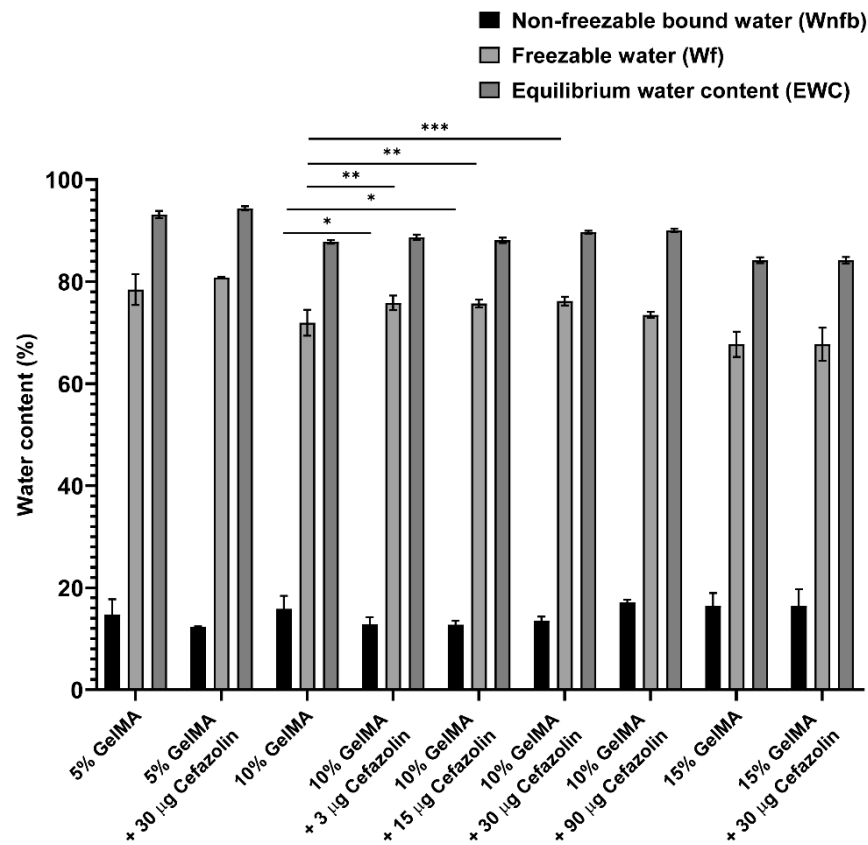

**Figure S13.** Water content for GelMA hydrogels (5% to 15% gel fraction) crosslinked with 0, 3, 15, 30, or 90  $\mu\text{g}$  cefazolin in PBS. Hydrogels were analyzed immediately after crosslinking. Equilibrium water content (EWC,  $n = 5$ ), non-freezable bound water ( $W_{\text{nfb}}$ ,  $n = 3$ ), and freezable water ( $W_{\text{f}}$ ,  $n = 3$ ). \* =  $p < 0.05$ . \*\* =  $p < 0.01$ .

## References

1. Tanaka, M.; Hayashi, T.; Morita, S. The roles of water molecules at the biointerface of medical polymers. *Polym. J.* **2013**, *45*, 701–710, doi:10.1038/pj.2012.229.
